# Supplementary material
Source: HighWire-hosted journal article supplement (https://www.cancerbiomed.org/content/20/6/421)
Supplement: media-1 [file media-1.pdf]

# Supplementary materials

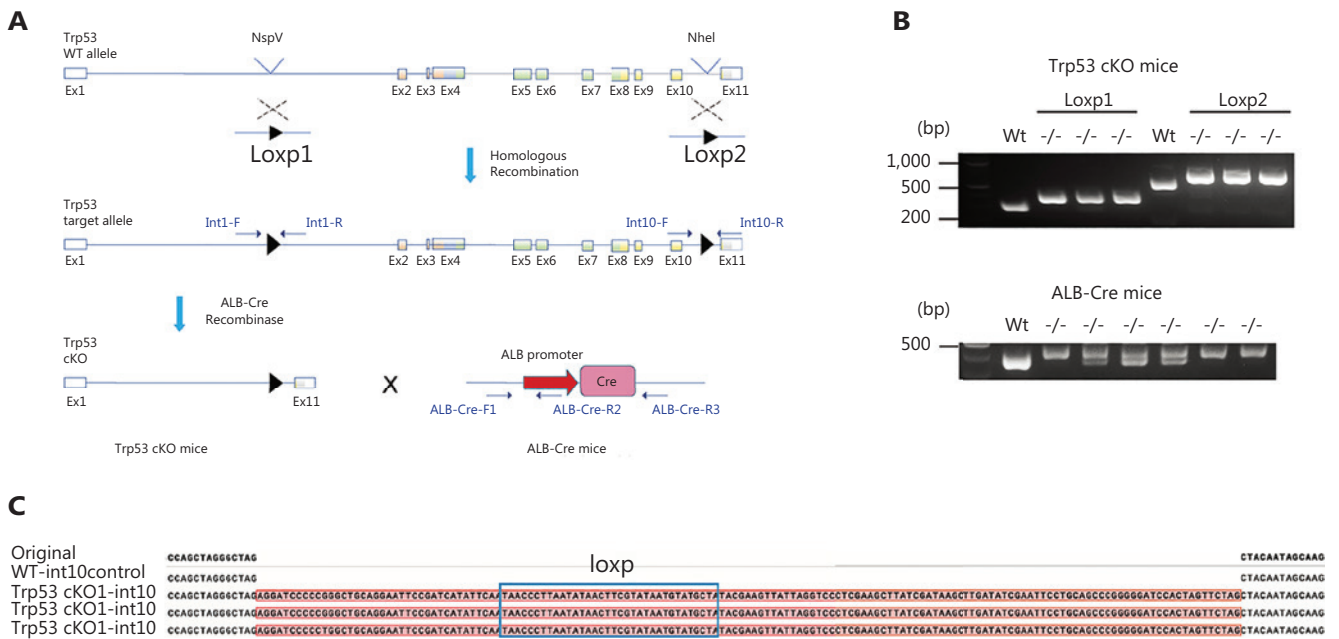

**Figure S1** The basic information of Trp53 cKO (conditional knockout) mice. (A) Schematic depicting the endogenous Trp53 locus, *Trp53* flox mice have loxP sites flanking exons 2-10 of the transformation related protein 53 gene. Exposure to Cre recombinase removes the floxed sequence - creating a null allele. When bred to mice with a Cre recombinase gene under the control of a ALB promoter, expression is deleted in the tissue of interest. (B) PCR for genotyping the Trp53 flox and the ALB-CRE alleles. For Trp53 flox genotyping-Mutant = 390 bp, Heterozygote = 270 bp and 390 bp, Wild type = 270 bp. For ALB-CRE genotyping. Mutant = ~390 bp Heterozygote = ~390 bp and 351 bp, Wild type = 351 bp. (C) The locus and sequence of loxP site in Trp53 cKO mice.

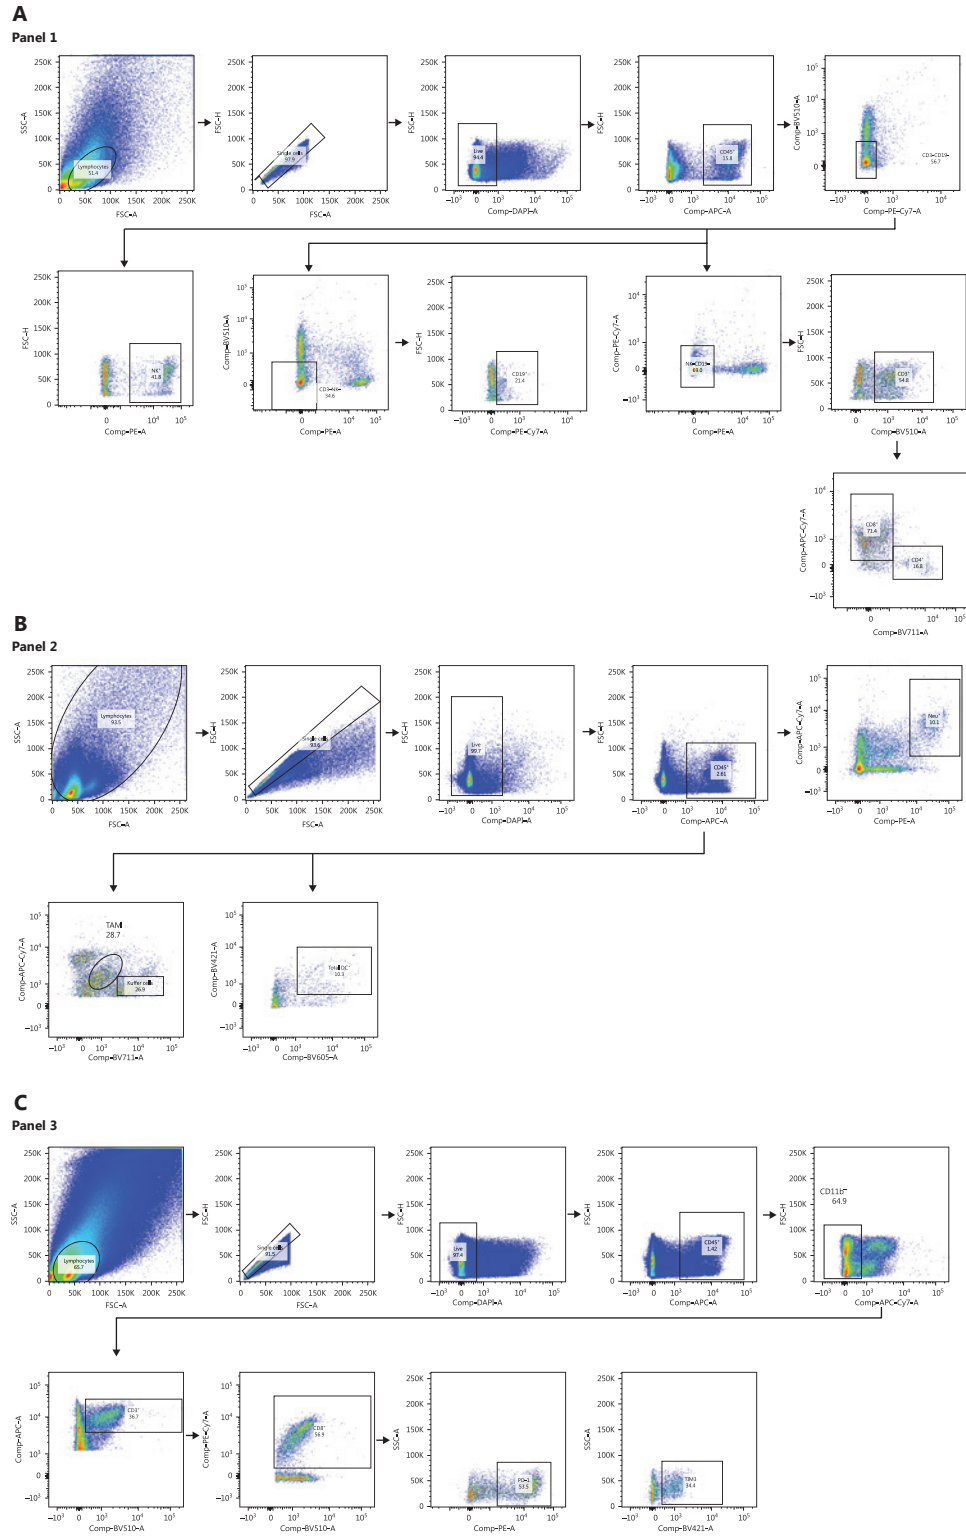

**Figure S2** (A) Gating strategy and illustrative plots of lymphoid cells of a representative sample. (B) Gating strategy and illustrative plots of myeloid cells of a representative sample. (C) Gating strategy and illustrative plots of CD8<sup>+</sup> T cells status of a representative sample.
